# Supplementary material for: A prospective observational study to assess PD-L1 expression in small biopsy samples for non-small-cell lung cancer
Source: Springer Nature journal article supplement (doi:10.1186/s12885-019-5773-3), 2019-06-07
Supplement: MOESM1 [file 16781524]

| Patient | Smoke | Method | Pathology | Stage | Tumor cell | TPS         |
|---------|-------|--------|-----------|-------|------------|-------------|
| P1      | Ex    | P260F  | Sq        | 1     | 150 $\leq$ | 80          |
| P2      | C     | P260F  | Sq        | 4     | 150 $\leq$ | <1          |
| P3      | Ex    | P260F  | Sq        | 2     | 150 $\leq$ | 20          |
| P4      | Ex    | P260F  | NSCLC     | 1     | 150 $\leq$ | 90          |
| P5      | Ex    | P260F  | Ad        | 2     | 150 $\leq$ | <1          |
| P6      | C     | P260F  | Ad        | 4     | 150 $\leq$ | <1          |
| P7      | Ex    | P260F  | Ad        | 2     | 150 $\leq$ | 10          |
| P8      | N     | P260F  | Ad        | 4     | 150 $\leq$ | 90          |
| P9      | Ex    | P260F  | Ad        | 4     | 150 $\leq$ | <1          |
| P10     | N     | P260F  | Ad        | 4     | <100       | <1          |
| P11     | Ex    | P260F  | Sq        | 3     | 150 $\leq$ | 10          |
| P12     | Ex    | P260F  | Sq        | 4     | 150 $\leq$ | 30          |
| P13     | N     | P260F  | Ad        | 4     | 150 $\leq$ | <1          |
| P14     | Ex    | P260F  | Ad        | 4     | 150 $\leq$ | 10          |
| P15     | N     | P260F  | Sq        | 2     | 150 $\leq$ | 80          |
| P16     | N     | P260F  | Ad        | 4     | 150 $\leq$ | 10          |
| P17     | N     | P260F  | Ad        | 4     | 150 $\leq$ | <1          |
| P18     | Ex    | P260F  | Sq        | 4     | 150 $\leq$ | 10          |
| P19     | Ex    | P260F  | Sq        | 3     | 150 $\leq$ | <1          |
| P20     | N     | P260F  | Ad        | 4     | 100-150    | undiagnosed |
| P21     | Ex    | P260F  | Sq        | 4     | 150 $\leq$ | 30          |
| P22     | Ex    | P260F  | LCNEC     | 4     | 150 $\leq$ | <1          |
| P23     | C     | P260F  | Ad        | 4     | 150 $\leq$ | 90          |
| P24     | Ex    | P260F  | Ad        | 4     | <100       | <1          |
| P25     | C     | P260F  | Sq        | 2     | 150 $\leq$ | undiagnosed |
| P26     | Ex    | P260F  | Sq        | 4     | 150 $\leq$ | 80          |
| P27     | Ex    | P260F  | Sq        | 1     | 150 $\leq$ | 30          |
| P28     | Ex    | P260F  | Ad        | 2     | 150 $\leq$ | <1          |
| P29     | Ex    | P260F  | Ad        | 4     | 150 $\leq$ | <1          |
| P30     | Ex    | P260F  | Ad        | 4     | 150 $\leq$ | 10          |
| P31     | N     | P260F  | AD        | 4     | 150 $\leq$ | 80          |
| P32     | Ex    | P260F  | Ad        | 4     | <100       | 90          |
| P33     | Ex    | P260F  | Sq        | 1     | 150 $\leq$ | <1          |
| P34     | N     | P260F  | Ad        | 4     | 150 $\leq$ | <1          |
| P35     | C     | P260F  | Ad        | 4     | <100       | undiagnosed |
| P36     | Ex    | P260F  | Sq        | 1     | 150 $\leq$ | <1          |
| P37     | Ex    | P260F  | Ad        | 4     | 150 $\leq$ | 40          |
| P38     | Ex    | P260F  | Ad        | 1     | <100       | <1          |
| P39     | Ex    | P260F  | Sq        | 4     | 150 $\leq$ | 60          |
| P40     | C     | P260F  | Sq        | 3     | 150 $\leq$ | 2           |
| P41     | Ex    | P260F  | Ad        | 4     | 100-150    | 10          |
| P42     | N     | P260F  | Ad        | 1     | 150 $\leq$ | <1          |
| P43     | Ex    | P260F  | Ad        | 1     | 150 $\leq$ | <1          |
| P44     | C     | P260F  | Ad        | 1     | 150 $\leq$ | <1          |
| P45     | Ex    | P260F  | Ad        | 3     | 150 $\leq$ | 50          |
| P46     | Ex    | P260F  | Sq        | 2     | 150 $\leq$ | 20          |
| P47     | N     | P260F  | Ad        | 1     | 100-150    | 70          |
| P48     | C     | P260F  | Ad        | 3     | 150 $\leq$ | <1          |
| P49     | Ex    | P260F  | Ad        | 1     | 150 $\leq$ | <1          |
| P50     | N     | P260F  | Ad        | 1     | <100       | 50          |
| P51     | Ex    | P260F  | Ad        | 1     | 150 $\leq$ | <1          |
| P52     | C     | P260F  | Ad        | 1     | 150 $\leq$ | 50          |
| P53     | N     | P260F  | Ad        | 1     | 150 $\leq$ | <1          |
| P54     | Ex    | P260F  | Ad        | 3     | 150 $\leq$ | 90          |
| P55     | C     | P260F  | Ad        | 1     | 150 $\leq$ | 40          |
| P56     | C     | P260F  | Ad        | 1     | 150 $\leq$ | 20          |

|     |    |       |          |   |      |    |
|-----|----|-------|----------|---|------|----|
| P57 | C  | P260F | Ad       | 1 | 150  | <1 |
| P58 | Ex | P260F | Ad       | 1 | 150  | 30 |
| P59 | Ex | P260F | Ad       | 1 | 150  | <1 |
| P60 | Ex | P260F | Sq       | 3 | 150  | <1 |
| P61 | Ex | P260F | Ad       | 1 | 150  | 70 |
| P62 | Ex | P260F | Ad       | 1 | 150  | 10 |
| P63 | C  | P260F | Small/Sq | 1 | 150  | 30 |
| P64 | Ex | P260F | Ad       | 1 | 150  | 10 |
| P65 | Ex | P260F | Ad       | 2 | 150  | <1 |
| P66 | Ex | P260F | Ad       | 4 | 150  | <1 |
| P67 | C  | P260F | Ad       | 4 | 150  | <1 |
| P68 | Ex | P260F | Ad       | 2 | 150  | 20 |
| P69 | Ex | P260F | Ad       | 4 | 150  | 5  |
| P70 | N  | P260F | Ad       | 1 | 150  | 10 |
| P71 | N  | P260F | Ad       | 1 | 150  | <1 |
| P72 | N  | P260F | Ad       | 1 | 150  | <1 |
| P73 | Ex | P260F | Ad       | 1 | 150  | 30 |
| P74 | N  | P260F | Ad       | 1 | 150  | <1 |
| P75 | C  | P260F | Ad       | 4 | 150  | 30 |
| P76 | Ex | P260F | Ad       | 1 | 150  | 90 |
| P77 | C  | P260F | Sq       | 1 | 150  | 70 |
| P78 | C  | P260F | Sq       | 4 | 150  | 10 |
| P79 | Ex | P260F | Ad       | 4 | 150  | 10 |
| P80 | C  | P260F | Ad       | 4 | 150  | 10 |
| P81 | Ex | P260F | Sq       | 3 | 150  | 30 |
| P82 | C  | P260F | Sq       | 1 | 150  | <1 |
| P83 | Ex | P260F | Ad       | 4 | <100 | 90 |
| P84 | Ex | P260F | Ad       | 4 | 150  | <1 |

|       |
|-------|
| Age   |
| 49-88 |

| Amount of tumor cell |          |          |          |          |          |          |          |
|----------------------|----------|----------|----------|----------|----------|----------|----------|
| Patient              | Sample 1 | Sample 2 | Sample 3 | Sample 4 | Sample 5 | Sample 6 | Sample 7 |
| P1                   | 1500     | 100      | 230      |          |          |          |          |
| P2                   | 230      | 250      | 350      | 150      | 150      |          |          |
| P3                   | 150      | 250      | 300      | 250      |          |          |          |
| P4                   | 800      |          |          |          |          |          |          |
| P5                   | 700      |          |          |          |          |          |          |
| P6                   | 200      | 150      | 50       |          |          |          |          |
| P7                   | 600      | 600      |          |          |          |          |          |
| P8                   | 1500     | 600      |          |          |          |          |          |
| P9                   | 700      | 1800     | 150      |          |          |          |          |
| P10                  | 30       |          |          |          |          |          |          |
| P11                  | 1100     | 400      |          |          |          |          |          |
| P12                  | 1100     | 700      | 800      |          |          |          |          |
| P13                  | 1400     |          |          |          |          |          |          |
| P14                  | 300      | 15       | 170      |          |          |          |          |
| P15                  | 1000     | 350      |          |          |          |          |          |
| P16                  | 2800     | 200      | 500      | 160      | 20       |          |          |
| P17                  | 58       | 26       | 42       |          |          |          |          |
| P18                  | 900      | 650      | 20       |          |          |          |          |
| P19                  | 1820     | 1820     |          |          |          |          |          |
| P20                  | 100      | 130      | 13       |          |          |          |          |
| P21                  | 20       | 900      |          |          |          |          |          |
| P22                  | 1000     |          |          |          |          |          |          |
| P23                  | 200      | 120      | 20       | 5        | 50       |          |          |
| P24                  | 30       | 30       | 50       | 30       |          |          |          |
| P25                  | 170      |          |          |          |          |          |          |
| P26                  | 100      | 40       | 40       | 160      | 350      |          |          |
| P27                  | 70       | 170      | 450      | 440      |          |          |          |
| P28                  | 550      | 40       | 30       | 130      | 350      | 130      |          |
| P29                  | 900      | 700      | 420      | 90       | 120      | 20       | 120      |
| P30                  | 40       | 70       | 16       | 0        | 11       | 15       |          |
| P31                  | 320      | 60       | 480      | 150      | 240      | 80       | 90       |
| P32                  | 100      | 12       | 30       | 10       |          |          |          |
| P33                  | 500      | 40       |          |          |          |          |          |
| P34                  | 7        | 30       | 90       | 40       | 10       | 70       |          |
| P35                  | 100      | 10       | 20       | 40       |          |          |          |
| P36                  | 150      | 1000     | 800      | 900      |          |          |          |
| P37                  | 100      | 130      | 40       | 70       | 80       | 600      | 60       |
| P38                  | 3        | 40       |          |          |          |          |          |
| P39                  | 780      |          |          |          |          |          |          |
| P40                  | 140      | 920      | 160      |          |          |          |          |
| P41                  | 140      |          |          |          |          |          |          |
| P42                  | 700      | 50       |          |          |          |          |          |
| P43                  | 160      | 140      |          |          |          |          |          |
| P44                  | 200      | 250      |          |          |          |          |          |
| P45                  | 3000     | 300      | 150      |          |          |          |          |
| P46                  | 400      |          |          |          |          |          |          |
| P47                  | 140      |          |          |          |          |          |          |
| P48                  | 700      | 1200     |          |          |          |          |          |
| P49                  | 45       | 800      |          |          |          |          |          |
| P50                  | 70       | 70       |          |          |          |          |          |
| P51                  | 280      | 160      |          |          |          |          |          |
| P52                  | 200      | 220      |          |          |          |          |          |
| P53                  | 70       | 170      |          |          |          |          |          |
| P54                  | 160      | 130      |          |          |          |          |          |
| P55                  | 40       | 120      |          |          |          |          |          |

|       |          |          |          |          |           |          |          |
|-------|----------|----------|----------|----------|-----------|----------|----------|
| P56   | 340      |          |          |          |           |          |          |
| P57   | 220      |          |          |          |           |          |          |
| P58   | 470      | 530      |          |          |           |          |          |
| P59   | 350      | 450      |          |          |           |          |          |
| P60   | 500      |          |          |          |           |          |          |
| P61   | 500      | 700      | 200      | 150      |           |          |          |
| P62   | 50       | 100      |          |          |           |          |          |
| P63   | 1000     | 200      |          |          |           |          |          |
| P64   | 50       |          |          |          |           |          |          |
| P65   | 300      | 200      |          |          |           |          |          |
| P66   | 100      | 50       | 100      | 300      | 200       |          |          |
| P67   | 50       | 20       | 30       |          |           |          |          |
| P68   | 300      | 100      | 150      | 30       | 100       |          |          |
| P69   | 200      | 200      | 200      |          |           |          |          |
| P70   | 200      |          |          |          |           |          |          |
| P71   | 40       | 80       | 30       | 50       | 200       | 200      |          |
| P72   | 100      | 50       |          |          |           |          |          |
| P73   | 200      | 200      | 100      | 50       |           |          |          |
| P74   | 300      | 100      | 300      |          |           |          |          |
| P75   | 1000     | 500      | 800      | 400      | 100       |          |          |
| P76   | 100      | 300      |          |          |           |          |          |
| P77   | 2000     |          |          |          |           |          |          |
| P78   | 100      | 300      |          |          |           |          |          |
| P79   | 100      | 150      | 30       |          |           |          |          |
| P80   | 100      | 30       |          |          |           |          |          |
| P81   | 500      | 80       |          |          |           |          |          |
| P82   | 400      | 300      | 500      | 1000     | 200       |          |          |
| P83   | 30       |          |          |          |           |          |          |
| P84   | 30       | 50       |          |          |           |          |          |
| AVE   | 454.7976 | 308.2537 | 212.4595 | 200.2174 | 145.4     | 159.2857 | 90       |
| 95%CI | 581.2476 | 401.5763 | 290.2715 | 315.1036 | 206.76446 | 348.5297 | 164.5241 |
|       | 328.3477 | 214.9311 | 134.6475 | 85.33115 | 84.035536 | -29.9582 | 15.47587 |

| Patient | Crush rate |
|---------|------------|
| P1      | 2          |
| P2      | 2          |
| P3      | 2          |
| P4      | 1          |
| P5      | 1          |
| P6      | 3          |
| P7      | 3          |
| P8      | 3          |
| P9      | 2          |
| P10     | 1          |
| P11     | 3          |
| P12     | 2          |
| P13     | 1          |
| P14     | 3          |
| P15     | 3          |
| P16     | 2          |
| P17     | 3          |
| P18     | 2          |
| P19     | 1          |
| P20     | 3          |
| P21     | 3          |
| P22     | 2          |
| P23     | 2          |
| P24     | 3          |
| P25     | 3          |
| P26     | 2          |
| P27     | 3          |
| P28     | 2          |
| P29     | 3          |
| P30     | 3          |
| P31     | 2          |
| P32     | 2          |
| P33     | 2          |
| P34     | 3          |
| P35     | 3          |
| P36     | 2          |
| P37     | 2          |
| P38     | 2          |
| P39     | 1          |
| P40     | 2          |
| P41     | 3          |
| P42     | 1          |
| P43     | 2          |
| P44     | 2          |
| P45     | 1          |
| P46     | 1          |
| P47     | 2          |
| P48     | 1          |
| P49     | 2          |
| P50     | 3          |
| P51     | 2          |
| P52     | 2          |
| P53     | 3          |
| P54     | 2          |
| P55     | 2          |
| P56     | 2          |

| MajorAxis |
|-----------|
| 50        |
| 70        |
| 60        |
| 25        |
| 20        |
| 50        |
| 60        |
| 140       |
| 80        |
| 5         |
| 70        |
| 70        |
| 30        |
| 20        |
| 50        |
| 90        |
| 30        |
| 40        |
| 100       |
| 30        |
| 50        |
| 90        |
| 30        |
| 40        |
| 30        |
| 50        |
| 30        |
| 50        |
| 30        |
| 50        |
| 50        |
| 50        |
| 30        |
| 40        |
| 40        |
| 50        |
| 50        |
| 50        |
| 30        |
| 40        |
| 40        |
| 50        |
| 100       |
| 30        |
| 40        |
| 70        |
| 40        |
| 70        |
| 40        |
| 70        |
| 80        |
| 60        |
| 40        |
| 20        |
| 50        |
| 20        |

| MinorAxis |
|-----------|
| 30        |
| 50        |
| 40        |
| 15        |
| 20        |
| 50        |
| 40        |
| 40        |
| 40        |
| 5         |
| 40        |
| 30        |
| 30        |
| 20        |
| 50        |
| 60        |
| 30        |
| 40        |
| 40        |
| 50        |
| 10        |
| 40        |
| 30        |
| 50        |
| 50        |
| 40        |
| 40        |
| 20        |
| 50        |
| 30        |
| 40        |
| 50        |
| 40        |
| 30        |
| 40        |
| 40        |
| 40        |
| 30        |
| 50        |
| 30        |
| 40        |
| 40        |
| 40        |
| 50        |
| 30        |
| 40        |
| 40        |
| 50        |
| 50        |
| 50        |
| 30        |
| 40        |
| 40        |
| 40        |
| 50        |
| 50        |
| 40        |
| 50        |
| 50        |
| 20        |
| 40        |
| 60        |
| 50        |
| 50        |
| 20        |

|     |   |
|-----|---|
| P57 | 2 |
| P58 | 1 |
| P59 | 1 |
| P60 | 2 |
| P61 | 3 |
| P62 | 3 |
| P63 | 1 |
| P64 | 3 |
| P65 | 2 |
| P66 | 2 |
| P67 | 3 |
| P68 | 2 |
| P69 | 3 |
| P70 | 2 |
| P71 | 2 |
| P72 | 3 |
| P73 | 3 |
| P74 | 2 |
| P75 | 2 |
| P76 | 3 |
| P77 | 2 |
| P78 | 3 |
| P79 | 2 |
| P80 | 3 |
| P81 | 1 |
| P82 | 1 |
| P83 | 3 |
| P84 | 2 |

2.178571

|     |
|-----|
| 100 |
| 70  |
| 50  |
| 100 |
| 60  |
| 40  |
| 50  |
| 50  |
| 50  |
| 40  |
| 30  |
| 50  |
| 50  |
| 40  |
| 30  |
| 50  |
| 40  |
| 50  |
| 70  |
| 50  |
| 70  |
| 120 |
| 50  |
| 60  |
| 50  |
| 70  |
| 60  |
| 30  |
| 40  |

52.5 x25 $\mu$ m

1.313 mm

|     |
|-----|
| 50  |
| 50  |
| 50  |
| 100 |
| 60  |
| 30  |
| 50  |
| 30  |
| 50  |
| 30  |
| 40  |
| 50  |
| 40  |
| 40  |
| 40  |
| 40  |
| 60  |
| 50  |
| 40  |
| 60  |
| 40  |
| 50  |
| 30  |
| 50  |
| 60  |
| 30  |

40.47619 x25 $\mu$ m

1.012 mm

|       |          |
|-------|----------|
| 95%CI | 1.438 mm |
|       | 1.187 mm |

|          |
|----------|
| 1.085 mm |
| 0.94 mm  |

|            |   |
|------------|---|
| Crush rate |   |
| < 5%       | 1 |
| 5-50%      | 2 |
| $\leq$ 50% | 3 |

| Patient | Smoke | Method | Pathology | Stage       | Tumor cell | TPS |
|---------|-------|--------|-----------|-------------|------------|-----|
| 1T-1    | C     | 1T     | Sq        | 3           | 150 $\leq$ | 70  |
| 1T-2    | C     | 1T     | Ad        | 3           | 150 $\leq$ | <1  |
| 1T-3    | C     | 1T     | Sq        | 4           | 150 $\leq$ | 50  |
| 1T-4    | Ex    | 1T     | Sq        | 4           | 150 $\leq$ | <1  |
| 1T-5    | C     | 1T     | Sq        | 3           | 150 $\leq$ | 60  |
| 1T-6    | Ex    | 1T     | Ad        | 3           | 150 $\leq$ | 50  |
| 1T-7    | C     | 1T     | Ad        | 3           | 150 $\leq$ | <1  |
| 1T-8    | N     | 1T     | Sq        | 3           | 150 $\leq$ | <1  |
| 1T-9    | Ex    | 1T     | Sq        | 3           | 150 $\leq$ | 70  |
| 1T-10   | N     | 1T     | Sq        | 4           | 150 $\leq$ | 10  |
| 1T-11   | C     | 1T     | Ad        | 3           | 150 $\leq$ | 100 |
| 1T-12   | C     | 1T     | Sq        | 1           | 150 $\leq$ | 40  |
| 1T-13   | Ex    | 1T     | Ad        | 4           | 150 $\leq$ | 60  |
| 1T-14   | Ex    | 1T     | Sq        | 4           | 150 $\leq$ | 20  |
| 1T-15   | Ex    | 1T     | Sq        | 3           | 150 $\leq$ | 80  |
| 1T-16   | Ex    | 1T     | Sq        | 3           | 150 $\leq$ | <1  |
| 1T-17   | N     | 1T     | Ad        | 4           | 150 $\leq$ | <1  |
| 1T-18   | Ex    | 1T     | Ad        | 1           | 150 $\leq$ | 10  |
| 1T-19   | C     | 1T     | Sq        | 4           | 150 $\leq$ | 20  |
| 1T-20   | Ex    | 1T     | Sq        | redeveloped | 150 $\leq$ | <1  |
| 1T-21   | Ex    | 1T     | Sq        | 2           | 150 $\leq$ | 90  |
| 1T-22   | Ex    | 1T     | Sq        | 2           | 150 $\leq$ | 70  |
| 1T-23   | Ex    | 1T     | Sq        | redeveloped | 150 $\leq$ | 50  |
| 1T-24   | Ex    | 1T     | NSCLC     | 3           | 150 $\leq$ | 10  |
| 1T-25   | C     | 1T     | Sq        | 2           | 150 $\leq$ | 20  |
| 1T-26   | C     | 1T     | Sq        | 4           | 150 $\leq$ | 10  |

|       |
|-------|
| Age   |
| 45-84 |

| Amount of tumor cell |          |          |          |          |          |
|----------------------|----------|----------|----------|----------|----------|
| Patient              | Sample 1 | Sample 2 | Sample 3 | Sample 4 | Sample 5 |
| 1T-1                 | 14500    |          |          |          |          |
| 1T-2                 | 5600     | 2100     |          |          |          |
| 1T-3                 | 5000     | 3200     |          |          |          |
| 1T-4                 | 2400     | 5600     |          |          |          |
| 1T-5                 | 1400     |          |          |          |          |
| 1T-6                 | 2000     | 2300     |          |          |          |
| 1T-7                 | 1300     | 400      | 2700     |          |          |
| 1T-8                 | 70       | 3400     | 900      |          |          |
| 1T-9                 | 11000    | 5500     | 5500     | 4500     |          |
| 1T-10                | 16000    | 24000    |          |          |          |
| 1T-11                | 10600    |          |          |          |          |
| 1T-12                | 4600     | 6800     | 13000    | 4500     | 1700     |
| 1T-13                | 3300     |          |          |          |          |
| 1T-14                | 3100     | 600      | 2100     | 400      |          |
| 1T-15                | 3100     | 1300     | 400      |          |          |
| 1T-16                | 2700     | 50       | 3400     | 400      |          |
| 1T-17                | 60       | 800      | 70       | 10       |          |
| 1T-18                | 100      | 380      | 80       |          |          |
| 1T-19                | 21000    | 2200     | 200      | 550      |          |
| 1T-20                | 30000    | 15000    |          |          |          |
| 1T-21                | 1000     | 700      | 700      |          |          |
| 1T-22                | 7000     |          |          |          |          |
| 1T-23                | 5000     |          |          |          |          |
| 1T-24                | 1000     | 2000     |          |          |          |
| 1T-25                | 600      | 100      |          |          |          |
| 1T-26                | 300      | 500      | 1000     |          |          |
| AVE                  | 5874.231 | 3846.5   | 2504.167 | 1726.667 | 1700     |
| 95%CI                | 8840.403 | 6598.659 | 4848.634 | 3988.892 |          |
|                      | 2908.058 | 1094.341 | 159.6996 | -535.559 |          |

| Patient   | Crush rate |
|-----------|------------|
| 1T-1      | 1          |
| 1T-2      | 1          |
| 1T-3      | 1          |
| 1T-4      | 2          |
| 1T-5      | 2          |
| 1T-6      | 1          |
| 1T-7      | 1          |
| 1T-8      | 1          |
| 1T-9      | 1          |
| 1T-10     | 1          |
| 1T-11     | 1          |
| 1T-12     | 1          |
| 1T-13     | 1          |
| 1T-14     | 2          |
| 1T-15     | 1          |
| 1T-16     | 1          |
| 1T-17     | 3          |
| 1T-18     | 2          |
| 1T-19     | 1          |
| 1T-20     | 1          |
| 1T-21     | 1          |
| 1T-22     | 1          |
| 1T-23     | 2          |
| 1T-24     | 3          |
| 1T-25     | 3          |
| 1T-26     | 2          |
| 1.4615385 |            |

| MajorAxis      |  |
|----------------|--|
| 200            |  |
| 220            |  |
| 100            |  |
| 100            |  |
| 100            |  |
| 75             |  |
| 80             |  |
| 90             |  |
| 200            |  |
| 270            |  |
| 400            |  |
| 120            |  |
| 90             |  |
| 90             |  |
| 100            |  |
| 130            |  |
| 40             |  |
| 50             |  |
| 100            |  |
| 300            |  |
| 100            |  |
| 250            |  |
| 150            |  |
| 80             |  |
| 100            |  |
| 90             |  |
| 139.4231 x25μm |  |
| 3.486 mm       |  |
| 4.359 mm       |  |
| 2.612 mm       |  |

| MinorAxis      |  |
|----------------|--|
| 130            |  |
| 130            |  |
| 60             |  |
| 60             |  |
| 40             |  |
| 50             |  |
| 60             |  |
| 60             |  |
| 140            |  |
| 180            |  |
| 300            |  |
| 100            |  |
| 40             |  |
| 60             |  |
| 60             |  |
| 100            |  |
| 30             |  |
| 30             |  |
| 100            |  |
| 100            |  |
| 80             |  |
| 100            |  |
| 100            |  |
| 60             |  |
| 80             |  |
| 40             |  |
| 88.07692 x25μm |  |
| 2.202 mm       |  |
| 2.777 mm       |  |
| 1.626 mm       |  |

| Crush rate |   |
|------------|---|
| < 5%       | 1 |
| 5-50%      | 2 |
| ≥ 50%      | 3 |

| Patient | Smoke | Method | Pathology | Stage       | Tumor cell | TPS |
|---------|-------|--------|-----------|-------------|------------|-----|
| NA1     | Ex    | TBNA   | Ad        | 3           | 150 $\leq$ | 90  |
| NA2     | Ex    | TBNA   | Sq        | 4           | 150 $\leq$ | 30  |
| NA3     | Ex    | TBNA   | meta Ca   | 2           | 150 $\leq$ | <1  |
| NA4     | Ex    | TBNA   | Sq        | redeveloped | 150 $\leq$ | 10  |
| NA5     | N     | TBNA   | Ad        | 3           | 150 $\leq$ | 30  |
| NA6     | Ex    | TBNA   | Sq        | 4           | 150 $\leq$ | 60  |
| NA7     | Ex    | TBNA   | Sq        | 4           | 150 $\leq$ | 80  |
| NA8     | Ex    | TBNA   | Sq        | 2           | 100-150    | <1  |
| NA9     | Ex    | TBNA   | Ad        | 4           | 150 $\leq$ | <1  |
| NA10    | Ex    | TBNA   | Ad        | 3           | 150 $\leq$ | 90  |
| NA11    | N     | TBNA   | Ad        | 4           | 150 $\leq$ | 10  |
| NA12    | Ex    | TBNA   | Ad        | 4           | 150 $\leq$ | 80  |
| NA13    | Ex    | TBNA   | Sq        | 4           | 100-150    | <1  |
| NA14    | C     | TBNA   | Ad        | 4           | 150 $\leq$ | 10  |
| NA15    | Ex    | TBNA   | Ad        | redeveloped | 150 $\leq$ | <1  |
| NA16    | C     | TBNA   | Ad        | 3           | 150 $\leq$ | 50  |
| NA17    | Ex    | TBNA   | Ad        | 4           | 150 $\leq$ | 100 |
| NA18    | C     | TBNA   | Sq        | 3           | 150 $\leq$ | 100 |
| NA19    | C     | TBNA   | Ad        | 3           | 150 $\leq$ | 90  |
| NA20    | Ex    | TBNA   | Sq        | 3           | 150 $\leq$ | 60  |
| NA21    | Ex    | TBNA   | Sq        | 4           | 150 $\leq$ | 40  |
| NA22    | C     | TBNA   | Ad        | redeveloped | 150 $\leq$ | 80  |
| NA23    | Ex    | TBNA   | Ad        | 4           | 150 $\leq$ | 60  |

|       |
|-------|
| Age   |
| 48-88 |

| Amount of tumor cell |          |          |          |          |  |
|----------------------|----------|----------|----------|----------|--|
| Patient              | Sample 1 | Sample 2 | Sample 3 | Sample 4 |  |
| NA1                  | 3600     |          |          |          |  |
| NA2                  | 500      | 300      | 600      |          |  |
| NA3                  | 330      |          |          |          |  |
| NA4                  | 600      | 400      |          |          |  |
| NA5                  | 88       | 630      |          |          |  |
| NA6                  | 200      |          |          |          |  |
| NA7                  | 230      | 500      | 33       |          |  |
| NA8                  | 100      |          |          |          |  |
| NA9                  | 3800     |          |          |          |  |
| NA10                 | 3000     | 33       |          |          |  |
| NA11                 | 9000     | 3500     |          |          |  |
| NA12                 | 1300     | 9000     |          |          |  |
| NA13                 | 100      | 40       |          |          |  |
| NA14                 | 2200     | 550      |          |          |  |
| NA15                 | 80       | 6300     | 700      | 40       |  |
| NA16                 | 100      | 100      |          |          |  |
| NA17                 | 100      | 300      |          |          |  |
| NA18                 | 200      |          |          |          |  |
| NA19                 | 800      | 300      | 2000     |          |  |
| NA20                 | 100      | 2000     |          |          |  |
| NA21                 | 200      |          |          |          |  |
| NA22                 | 200      | 150      |          |          |  |
| NA23                 | 300      | 200      |          |          |  |
| AVE                  | 1179.478 | 1518.938 | 833.25   | 40       |  |
| 95%CI                | 2071.719 | 2904.925 | 2156.253 |          |  |
|                      | 287.238  | 132.9499 | -489.753 |          |  |

| Patient | Crush rate |
|---------|------------|
| NA1     | 2          |
| NA2     | 2          |
| NA3     | 2          |
| NA4     | 2          |
| NA5     | 1          |
| NA6     | 3          |
| NA7     | 3          |
| NA8     | 1          |
| NA9     | 1          |
| NA10    | 1          |
| NA11    | 1          |
| NA12    | 1          |
| NA13    | 1          |
| NA14    | 1          |
| NA15    | 1          |
| NA16    | 2          |
| NA17    | 2          |
| NA18    | 1          |
| NA19    | 1          |
| NA20    | 1          |
| NA21    | 2          |
| NA22    | 2          |
| NA23    | 3          |
|         | 1.6086957  |

| MajorAxis |
|-----------|
| 100       |
| 30        |
| 50        |
| 30        |
| 60        |
| 150       |
| 50        |
| 10        |
| 80        |
| 80        |
| 100       |
| 100       |
| 10        |
| 70        |
| 50        |
| 50        |
| 100       |
| 30        |
| 150       |
| 70        |
| 20        |
| 50        |
| 40        |

64.34783 x25µm  
1.609 mm

| MinorAxis |
|-----------|
| 60        |
| 20        |
| 20        |
| 10        |
| 45        |
| 100       |
| 50        |
| 10        |
| 50        |
| 50        |
| 70        |
| 50        |
| 10        |
| 70        |
| 50        |
| 50        |
| 100       |
| 50        |
| 150       |
| 70        |
| 20        |
| 50        |
| 30        |

51.52174 x25µm  
1.288 mm

95%CI 2.03 mm  
1.188 mm

1.646 mm  
0.93 mm

| Crush rate |   |
|------------|---|
| < 5%       | 1 |
| 5-50%      | 2 |
| ≤ 50%      | 3 |

| Patient | Smoke | Method      | Pathology | Stage       | Tumor cell | TPS         |  |
|---------|-------|-------------|-----------|-------------|------------|-------------|--|
| CT1     | Ex    | Core-needle | Ad        | 3           | 150 $\leq$ | 90          |  |
| CT2     | C     | Core-needle | Carcinoma | 4           | 150 $\leq$ | 80          |  |
| CT3     | Ex    | Core-needle | Sq        | 2           | 150 $\leq$ | 90          |  |
| CT4     | C     | Core-needle | Sq        | redeveloped | 150 $\leq$ | <1          |  |
| CT5     | Ex    | Core-needle | Ad        | 3           | 150 $\leq$ | <1          |  |
| CT6     | Ex    | Core-needle | Sq        | 4           | 150 $\leq$ | undiagnosed |  |
| CT7     | Ex    | Core-needle | Ad        | 4           | 150 $\leq$ | <1          |  |
| CT8     | Ex    | Core-needle | MetaCa    | 2           | 150 $\leq$ | 70          |  |
| CT9     | C     | Core-needle | Sq        | 4           | 150 $\leq$ | 70          |  |
| CT10    | Ex    | Core-needle | Ad        | 3           | 150 $\leq$ | 70          |  |
| CT11    | N     | Core-needle | Ad        | 4           | 150 $\leq$ | 60          |  |
| CT12    | Ex    | Core-needle | Ad        | 4           | 150 $\leq$ | 30          |  |
| CT13    | Ex    | Core-needle | Ad        | 4           | 150 $\leq$ | 30          |  |
| CT14    | C     | Core-needle | Ad        | 4           | 150 $\leq$ | 30          |  |
| CT15    | Ex    | Core-needle | Ca        | redeveloped | 150 $\leq$ | <1          |  |
| CT16    | C     | Core-needle | Ad        | 3           | 150 $\leq$ | <1          |  |
| CT17    | N     | Core-needle | Ad        | 4           | 150 $\leq$ | <1          |  |
| CT18    | Ex    | Core-needle | Sq        | 4           | 100-150    | 30          |  |
| CT19    | Ex    | Core-needle | Ad        | 3           | 150 $\leq$ | <1          |  |
| CT20    | Ex    | Core-needle | Ad        | 2           | 150 $\leq$ | 40          |  |

|       |
|-------|
| Age   |
| 42-93 |

| Amount of tumor cell |          |          |          |          |          |
|----------------------|----------|----------|----------|----------|----------|
| Patient              | Sample 1 | Sample 2 | Sample 3 | Sample 4 | Sample 5 |
| CT1                  | 2900     |          |          |          |          |
| CT2                  | 500      | 1000     | 1900     |          |          |
| CT3                  | 330      | 180      | 1000     |          |          |
| CT4                  | 1000     | 3000     |          |          |          |
| CT5                  | 4000     |          |          |          |          |
| CT6                  | 1400     |          |          |          |          |
| CT7                  | 22000    |          |          |          |          |
| CT8                  | 37500    |          |          |          |          |
| CT9                  | 180      | 200      | 360      | 300      |          |
| CT10                 | 10400    |          |          |          |          |
| CT11                 | 5200     | 3900     | 3500     | 3900     | 440      |
| CT12                 | 720      | 10       | 1500     |          |          |
| CT13                 | 12000    | 12000    | 8000     |          |          |
| CT14                 | 3100     | 5000     |          |          |          |
| CT15                 | 15300    |          |          |          |          |
| CT16                 | 100      |          |          |          |          |
| CT17                 | 1400     |          |          |          |          |
| CT18                 | 100      |          |          |          |          |
| CT19                 | 2800     | 2200     |          |          |          |
| CT20                 | 4000     | 2000     | 1000     |          |          |
| AVE                  | 6246.5   | 2949     | 2465.714 | 2100     | 440      |
| 95%CI                | 10656.35 | 5518.942 | 4903.327 | 24971.17 |          |
|                      | 1836.65  | 379.0584 | 28.10173 | -2077117 |          |

| Patient | Crush rate |
|---------|------------|
| CT1     | 1          |
| CT2     | 1          |
| CT3     | 2          |
| CT4     | 1          |
| CT5     | 1          |
| CT6     | 1          |
| CT7     | 1          |
| CT8     | 1          |
| CT9     | 2          |
| CT10    | 1          |
| CT11    | 1          |
| CT12    | 2          |
| CT13    | 2          |
| CT14    | 1          |
| CT15    | 1          |
| CT16    | 3          |
| CT17    | 1          |
| CT18    | 3          |
| CT19    | 1          |
| CT20    | 1          |
|         | 1.4        |

| MajorAxis         |
|-------------------|
| 150               |
| 200               |
| 450               |
| 160               |
| 200               |
| 70                |
| 300               |
| 400               |
| 40                |
| 300               |
| 400               |
| 120               |
| 450               |
| 250               |
| 300               |
| 200               |
| 280               |
| 130               |
| 550               |
| 100               |
| 252.5 x25 $\mu$ m |
| 6.313 mm          |

| MinorAxis         |
|-------------------|
| 15                |
| 20                |
| 35                |
| 25                |
| 25                |
| 30                |
| 25                |
| 320               |
| 20                |
| 50                |
| 30                |
| 20                |
| 40                |
| 30                |
| 30                |
| 20                |
| 20                |
| 50                |
| 50                |
| 44.25 x25 $\mu$ m |
| 1.106 mm          |

| 95%CI    |
|----------|
| 7.965 mm |
| 4.66 mm  |

|          |
|----------|
| 1.876 mm |
| 0.337 mm |

| Crush rate |   |
|------------|---|
| < 5%       | 1 |
| 5-50%      | 2 |
| $\leq$ 50% | 3 |
